# Supplementary material for: A Validation Study on Immunophenotypic Differences in T-lymphocyte Chromosomal Radiosensitivity between Newborns and Adults in South Africa
Source: MDPI journal article supplement (doi:10.3390/radiation2010001), 2021-12-22
Supplement: s1 [file s1]

# Supplementary Data: A Validation Study on Immunophenotypic Differences in T-lymphocyte Chromosomal Radiosensitivity between Newborns and Adults in South Africa

Monique Engelbrecht, Roya Ndimba, Xanthene Miles, Shankari Nair, Matthys Hendrik Botha, Elbie Zwanepoel, Evan de Kock, Maryna de Kock and Charlot Vandevoorde

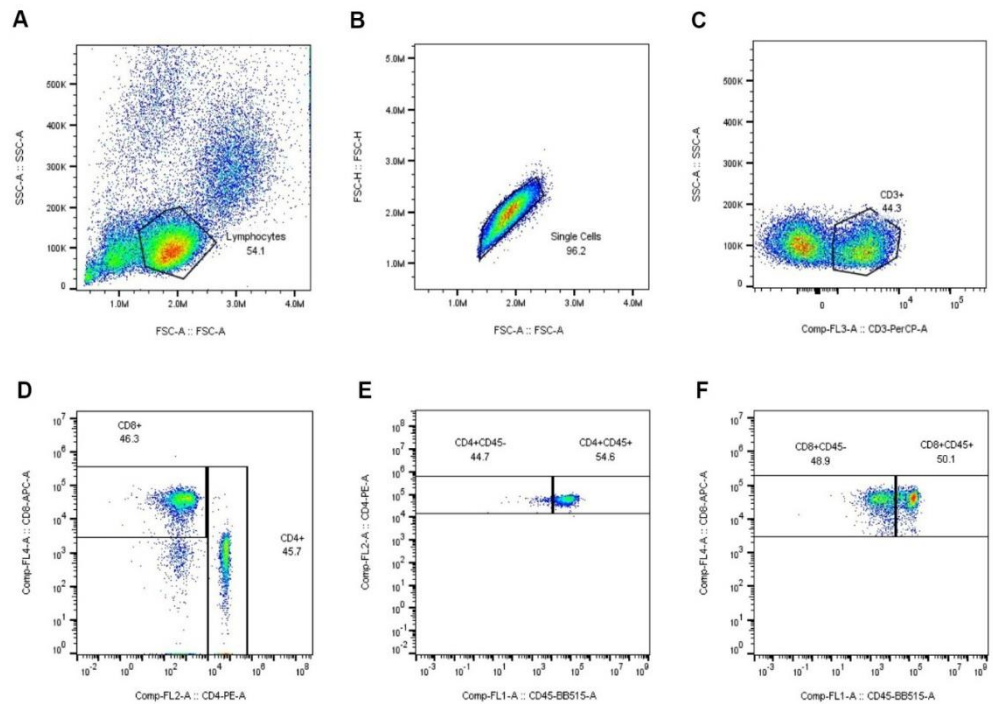

**Figure S1.** The gating strategy for the expression of naïve (CD45RA) markers on peripheral blood CD4<sup>+</sup> and CD8<sup>+</sup> T-lymphocytes in adults (APB). The peripheral blood T-lymphocytes were gated on forward (FSC) versus side scatter (SSC) to select the lymphocyte cell population (A). The cells were gated on FSC-Height (FSC-H) vs FSC-Area (FSC-A) to exclude all the doublets and to generate the singlets gate (B). Subsequently, the cells were gated on CD3-PerCP vs SSC-A to include all CD3<sup>+</sup> cells (C), then gated on the CD4<sup>+</sup> or CD8<sup>+</sup> population (D). All the subpopulations were analysed on the CD4-PE-A (E) or CD8-APC-A (F) versus CD45-BB515-A. Data were analysed using FlowJo v10.6.1 software, and population frequencies expressed as percent of the CD4<sup>+</sup> or CD8<sup>+</sup> parent population.

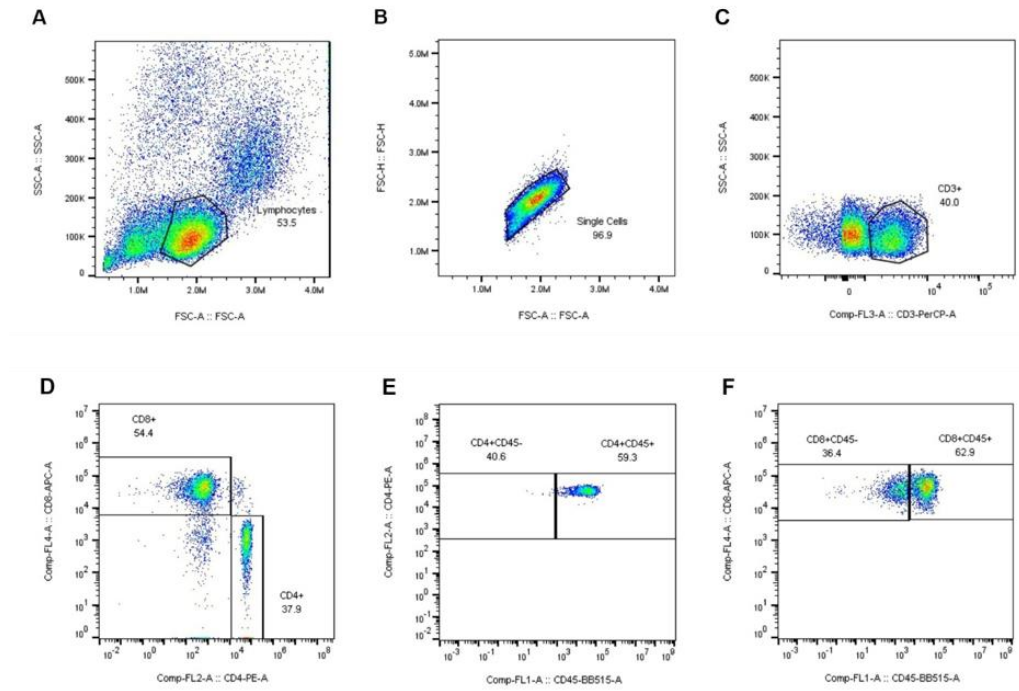

**Figure S2.** The gating strategy for the expression of memory (CD45RO) markers on peripheral blood CD4<sup>+</sup> and CD8<sup>+</sup> T-lymphocytes in adults (APB). The peripheral blood T-lymphocytes were gated on forward (FSC) versus side scatter (SSC) to select the lymphocyte cell population (A). The cells were gated on FSC-Height (FSC-H) vs FSC-Area (FSC-A) to exclude all the doublets and to generate the singlets gate (B). Subsequently, the cells were gated on CD3-PerCP vs SSC-A to include all CD3<sup>+</sup> cells (C), then gated on the CD4<sup>+</sup> or CD8<sup>+</sup> population (D). All the subpopulations were analysed on the CD4-PE-A (E) or CD8-APC-A (F) versus CD45-BB515-A. Data were analysed using FlowJo v10.6.1 software, and population frequencies expressed as percent of the CD4<sup>+</sup> or CD8<sup>+</sup> parent population.

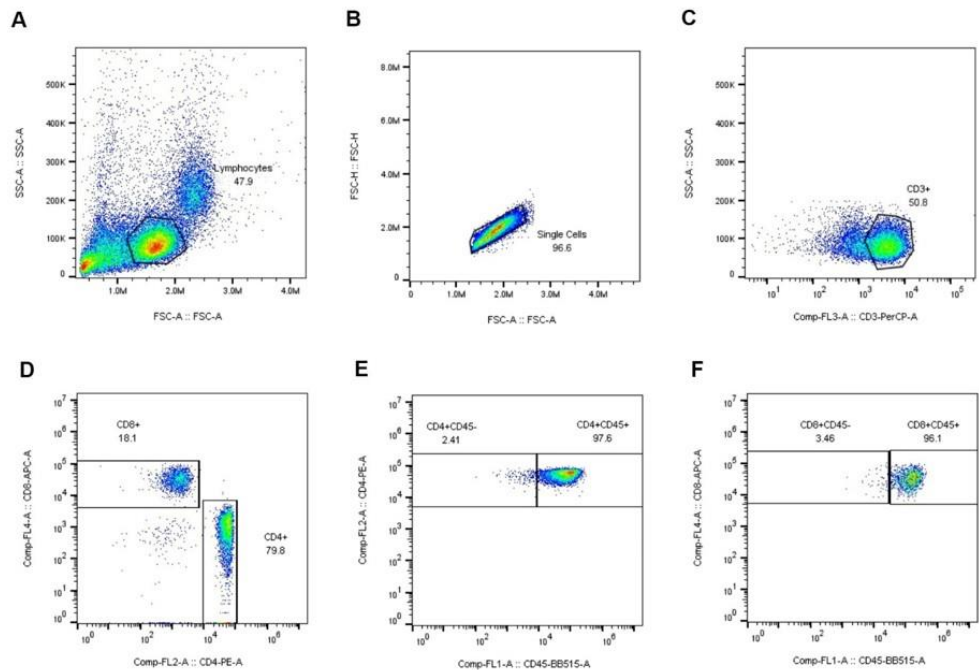

**Figure S3.** The gating strategy for the expression of naïve (CD45RA) markers on peripheral blood CD4<sup>+</sup> and CD8<sup>+</sup> T-lymphocytes in newborns (UCB). The peripheral blood T-lymphocytes were gated on forward (FSC) versus side scatter (SSC) to select the lymphocyte cell population (A). The cells were gated on FSC-Height (FSC-H) vs FSC-Area (FSC-A) to exclude all the doublets and to generate the singlets gate (B). Subsequently, the cells were gated on CD3-PerCP vs SSC-A to include all CD3<sup>+</sup> cells (C), then gated on the CD4<sup>+</sup> or CD8<sup>+</sup> population (D). All the subpopulations were analysed on the CD4-PE-A (E) or CD8-APC-A (F) versus CD45-BB515-A. Data were analysed using FlowJo v10.6.1 software, and population frequencies expressed as percent of the CD4<sup>+</sup> or CD8<sup>+</sup> parent population.

the singlets gate (B). Subsequently, the cells were gated on CD3-PerCP vs SSC-A to include all CD3<sup>+</sup> cells (C), then gated on the CD4<sup>+</sup> or CD8<sup>+</sup> population (D). All the subpopulations were analysed on the CD4-PE-A (E) or CD8-APC-A (F) versus CD45-BB515-A. Data were analysed using FlowJo v10.6.1 software, and population frequencies expressed as percent of the CD4<sup>+</sup> or CD8<sup>+</sup> parent population.

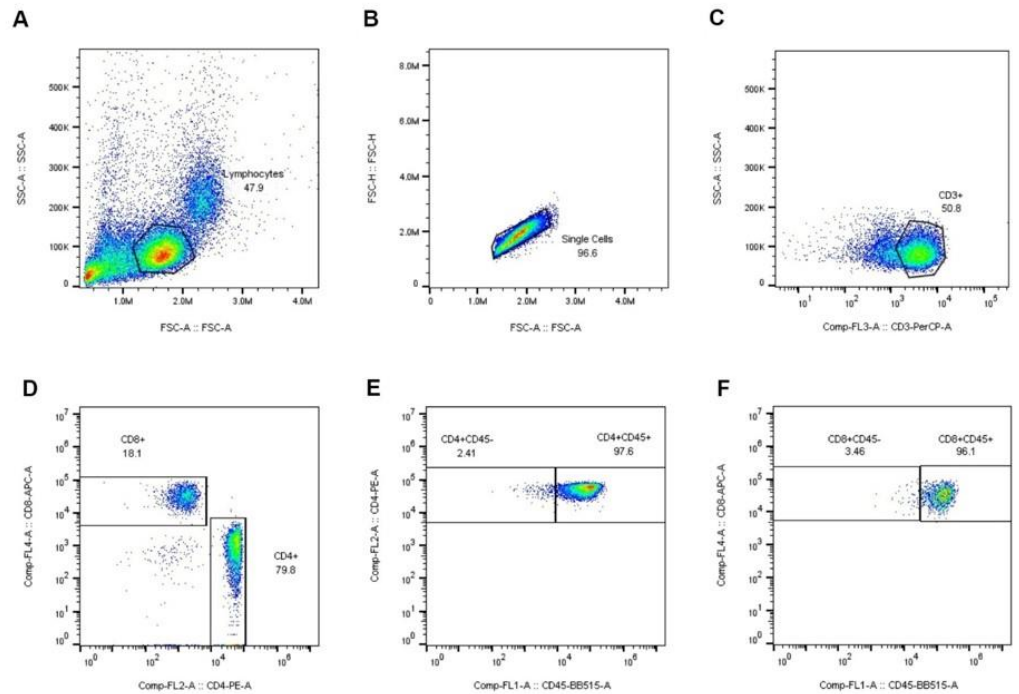

**Figure S4.** The gating strategy for the expression of memory (CD45RO) markers on peripheral blood CD4<sup>+</sup> and CD8<sup>+</sup> T-lymphocytes in newborns (UCB). The peripheral blood T-lymphocytes were gated on forward (FSC) versus side scatter (SSC) to select the lymphocyte cell population (A). The cells were gated on FSC-Height (FSC-H) vs FSC-Area (FSC-A) to exclude all the doublets and to generate the singlets gate (B). Subsequently, the cells were gated on CD3-PerCP vs SSC-A to include all CD3<sup>+</sup> cells (C), then gated on the CD4<sup>+</sup> or CD8<sup>+</sup> population (D). All the subpopulations were analysed on the CD4-PE-A (E) or CD8-APC-A (F) versus CD45-BB515-A. Data were analysed using FlowJo v10.6.1 software, and population frequencies expressed as percent of the CD4<sup>+</sup> or CD8<sup>+</sup> parent population.
