# Supplementary material for: A Validation Study on Immunophenotypic Differences in T-lymphocyte Chromosomal Radiosensitivity between Newborns and Adults in South Africa
Source: MDPI journal article supplement (doi:10.3390/radiation2010001), 2021-12-22
Supplement: s1 [file s1]

Archive with 1 entries (1 files):
- radiation-1515378-supplementary.pdf
